# Supplementary material for: Dynamically encircling an exceptional point through phase-tracked closed-loop control
Source: Research Square preprint supplement (doi:10.21203/rs.3.rs-6080044/v1), 2025-08-27
Supplement: Supplementary file 1 [file 20e76f6ffa36e7cdd9534d1b.pdf]

# **Dynamically encircling an exceptional point through phase-tracked closed-loop control**

Sen Zhang et al.

(Dated: February 21, 2025)

## CONTENTS

|                                                                         |   |
|-------------------------------------------------------------------------|---|
| SUPPLEMENTARY NOTE 1. Device fabrication                                | 3 |
| SUPPLEMENTARY NOTE 2. Equations of motion and the effective Hamiltonian | 5 |
| A. Equations of motion in driving frames                                | 5 |
| B. Effective Hamiltonian                                                | 6 |
| C. Steady-state responses                                               | 8 |

## SUPPLEMENTARY NOTE 1. DEVICE FABRICATION

As illustrated in Supplementary Fig. 1a, the fabrication of the device commences with a 6-inch silicon-on-insulator (SOI) wafer. This wafer comprises a 10  $\mu\text{m}$ -thick P-type  $\langle 100 \rangle$  single-crystal silicon conductive layer with a resistivity of 0.01  $\Omega\cdot\text{cm}$ , a 3  $\mu\text{m}$ -thick oxide layer, and a 500  $\mu\text{m}$ -thick single-crystal silicon handle layer. The fabrication process involves several key steps:

**1. Platform etching:** Shallow cavities are etched into the conductive layer of the substrate SOI using a deep reactive ion etching (DRIE) technique to create bonding platforms and conductive routings. Importantly, the tops of the bonding platforms remain unetched, while the tops of the conductive routings are etched, achieving a height of 5  $\mu\text{m}$ . Prior to this etching process, alignment marks are etched on the handle layer to facilitate subsequent patterning and bonding operations.

**2. Wafer direct bonding:** A structure SOI is then bonded to the etched substrate SOI through a direct wafer bonding process. This structure SOI consists of a 100  $\mu\text{m}$ -thick P-type  $\langle 100 \rangle$  single-crystal silicon structural layer, also exhibiting a resistivity of 0.01  $\Omega\cdot\text{cm}$ , in addition to a 3  $\mu\text{m}$ -thick oxide layer and a 450  $\mu\text{m}$ -thick single-crystal silicon handle layer. The structure layer of the second SOI is tightly bonded to the platforms of the substrate SOI.

**3. Chemical mechanical polishing (CMP):** The handle and oxide layers of the structure SOI are subsequently removed using a CMP process, leaving a 100  $\mu\text{m}$ -thick structural layer firmly bonded to the substrate SOI.

**4. Metal pads patterning:** With the aid of the previously etched alignment marks, metal pads are patterned and sputtered onto the structural layer to facilitate wire bonding.

**5. Structure release:** The structure layer is patterned using a photolithography process and then etched through using a DRIE process to release the resonator, the electrodes, and the pads. The alignment of the structure with the platforms underneath is guaranteed using the alignment marks.

The completed wafer, as depicted in Supplementary Fig. 1b, contains a total of 333 devices. The dicing process employs stealth laser cutting along the dicing lanes shown in Supplementary Fig. 1c, during which the laser is focused inside the wafer to induce a series of defects. These internal imperfections serve as starting points for crack propagation. By applying tension to the tape adhered to the wafer's underside, the devices are separated from the cut lanes due

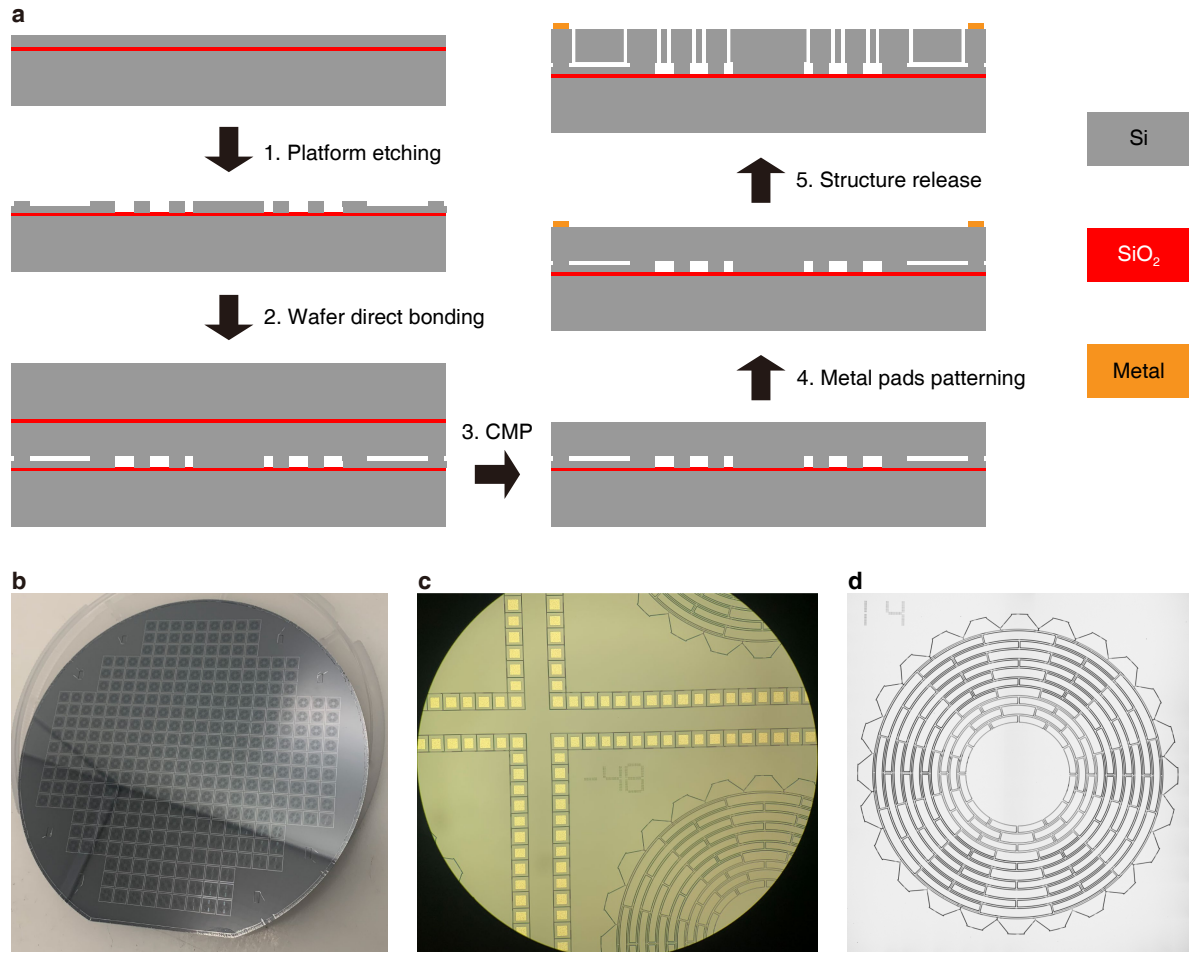

**Supplementary Figure 1. Fabrication of the non-Hermitian MEMS resonator.** (a) MEMS fabrication process of the devices. (b) The fabricated 6-inch wafer with 333 devices. (c) Details of the dicing lanes. (d) The microscopic picture of a non-Hermitian MEMS disk resonator.

to stress concentration. This technique avoids contamination of the bare devices, as the laser cutting occurs internally. Finally, the microscopic image of a fabricated non-Hermitian MEMS resonator is presented in Supplementary Fig. 1d, and the device is subsequently packaged in a carrier to maintain a vacuum of 0.001 Pa, thereby substantially mitigates air damping effects.

## SUPPLEMENTARY NOTE 2. EQUATIONS OF MOTION AND THE EFFECTIVE HAMILTONIAN

### A. Equations of motion in driving frames

We commence with the classical Newtonian equations of motion for the system, described by

$$\begin{bmatrix} \ddot{x} \\ \ddot{y} \end{bmatrix} + \begin{bmatrix} \gamma_1 & 0 \\ 0 & \gamma_2 \end{bmatrix} \begin{bmatrix} \dot{x} \\ \dot{y} \end{bmatrix} + \begin{bmatrix} \omega_1^2 + \Delta_p/2 & \Delta_p/2 \\ \Delta_p/2 & \omega_2^2 + \Delta_p/2 \end{bmatrix} \begin{bmatrix} x \\ y \end{bmatrix} = \begin{bmatrix} F \cos(\omega_d t)/m \\ 0 \end{bmatrix}, \quad (\text{S.1})$$

where  $\Delta_p = 2\kappa V_0 V_p \cos(\omega_p t) - 2\kappa V_p^2/2$ . We apply the rotating-wave approximation that considers higher-harmonic idler waves, the displacements can be expanded as

$$\begin{aligned} x &= \sum_{m=-\infty}^{\infty} \frac{1}{2} A_m e^{-i(\omega_d + m\omega_p)t} + \text{c.c.}, \\ y &= \sum_{m=-\infty}^{\infty} \frac{1}{2} B_m e^{-i(\omega_d + m\omega_p)t} + \text{c.c.}, \end{aligned} \quad (\text{S.2})$$

where c.c. denotes complex conjugation,  $A_m$  and  $B_m$  are the slowly varying complex amplitudes of the  $m$ -th idler wave. The 0-th idler wave is the exact mode itself. Substituting (S.2) into (S.1) and omitting the second-order time derivatives of the complex amplitudes, we have,

$$\begin{aligned} & [\gamma_1 - 2i(\omega_d + m\omega_p)] \dot{A}_m - \left[ (\omega_d + m\omega_p)^2 - \omega_1^2 + \frac{\kappa V_p^2}{4} + i\gamma_1(\omega_d + m\omega_p) \right] A_m \\ & - \frac{\kappa V_p^2}{4} B_m + \frac{\kappa V_0 V_p}{2} (A_{m-1} + A_{m+1}) + \frac{\kappa V_0 V_p}{2} (B_{m-1} + B_{m+1}) = \frac{F}{2m} \delta_{m,0}, \end{aligned} \quad (\text{S.3})$$

$$\begin{aligned} & [\gamma_2 - 2i(\omega_d + m\omega_p)] \dot{B}_m - \left[ (\omega_d + m\omega_p)^2 - \omega_2^2 + \frac{\kappa V_p^2}{4} + i\gamma_2(\omega_d + m\omega_p) \right] B_m \\ & - \frac{\kappa V_p^2}{4} A_m + \frac{\kappa V_0 V_p}{2} (B_{m-1} + B_{m+1}) + \frac{\kappa V_0 V_p}{2} (A_{m-1} + A_{m+1}) = 0. \end{aligned} \quad (\text{S.4})$$

In this study, actuation is applied to mode 1,  $\omega_d \sim \omega_1$ . The pump frequency is tuned close to the frequency difference,  $\omega_p \sim \Delta\omega \equiv \omega_2 - \omega_1$ . Consequently, this configuration facilitates the up-conversion of the drive and pump, which effectively reaches mode 2,  $\omega_d + \omega_p \sim \omega_2$ . To simplify our analysis, we focus exclusively on the first-order dynamical interaction, which is

captured by setting  $m = 0$  in (S.3) and  $m = 1$  in (S.4),

$$(\gamma_1 - 2i\omega_d) \dot{A}_m - \left( \omega_d^2 - \omega_1^2 + \frac{\kappa V_p^2}{4} + i\gamma_1\omega_d \right) A_0 + \frac{\kappa V_0 V_p}{2} B_1 = \frac{F}{2m}, \quad (\text{S.5})$$

$$\begin{aligned} & [\gamma_2 - 2i(\omega_d + \omega_p)] \dot{B}_1 - \left[ (\omega_d + \omega_p)^2 - \omega_2^2 + \frac{\kappa V_p^2}{4} + i\gamma_2(\omega_d + \omega_p) \right] B_1 \\ & + \frac{\kappa V_0 V_p}{2} A_0 = 0. \end{aligned} \quad (\text{S.6})$$

By dividing equations (S.5) and (S.6) by  $2\omega_1$  and  $2\omega_2$ , respectively, we derive the approximated first-order equations of motion within the driving rotating frames,

$$i \begin{bmatrix} \dot{A}_0 \\ \dot{B}_1 \end{bmatrix} = \begin{bmatrix} \omega_1 - \frac{\kappa V_p^2}{8\omega_1} - \omega_d - i\gamma_1/2 & \frac{\kappa V_0 V_p}{4\omega_1} \\ \frac{\kappa V_0 V_p}{4\omega_2} & \omega_2 - \frac{\kappa V_p^2}{8\omega_2} - \omega_p - \omega_d - i\gamma_2/2 \end{bmatrix} \begin{bmatrix} A_0 \\ B_1 \end{bmatrix} - \begin{bmatrix} \frac{F}{4m\omega_1} \\ 0 \end{bmatrix}.$$

During the calculations, we employ several approximations:  $\gamma_{1,2}/(2\omega_{1,2}) \sim 0$ ,  $\omega_d \sim \omega_1$ ,  $\omega_d + \omega_p \sim \omega_2$ ,  $(\omega_d^2 - \omega_1^2)/(2\omega_1) \sim \omega_d - \omega_1$ , and  $[(\omega_d + \omega_p)^2 - \omega_2^2]/(2\omega_2) \sim \omega_d + \omega_p - \omega_2$ . Updating  $B_1$  by a slightly scaled variable  $B_1\omega_2/\omega_1$ , we can further obtain the formal first-order equations of motion for the system in the driving frames,

$$i \begin{bmatrix} \dot{A}_0 \\ \dot{B}_1 \end{bmatrix} = \begin{bmatrix} \Omega_1 - \omega_d - i\gamma_1/2 & g \\ g & \Omega_2 - \omega_d - i\gamma_2/2 \end{bmatrix} \begin{bmatrix} A_0 \\ B_1 \end{bmatrix} - \begin{bmatrix} f \\ 0 \end{bmatrix}, \quad (\text{S.7})$$

where,  $\Omega_1 = \omega_1 - \kappa V_p^2/(8\omega_1)$ ,  $\Omega_2 = \omega_2 - \kappa V_p^2/(8\omega_2) - \omega_p$ ,  $g = \kappa V_0 V_p/(4\omega_1)$ , and  $f = F/(4m\omega_1)$ .

## B. Effective Hamiltonian

The equations of motion (S.7) are formulated in fast rotating driving frames of  $\omega_d$  for mode 1 and  $\omega_d + \omega_p$  for mode 2. To facilitate analysis, we now transform these equations into a slowly rotating frame of  $\omega_p$ , which is known as the Floquet frame. This transformation is achieved by letting

$$\begin{aligned} x_0 &= \frac{1}{2} A_0 e^{-i\omega_d t} + \text{c.c.}, \\ y_1 &= \frac{1}{2} B_1 e^{-i\omega_d t} + \text{c.c.}, \end{aligned}$$

or

$$\begin{aligned} A_0 &= 2x_0 e^{i\omega_d t} - A_0^* e^{2i\omega_d t}, \\ B_1 &= 2y_1 e^{i\omega_d t} - B_1^* e^{2i\omega_d t}. \end{aligned} \quad (\text{S.8})$$

where the superscript “\*” denotes the complex conjugation of the variable. Substituting (S.8) into (S.7), we have

$$\begin{aligned} & 2i(\dot{x}_0 + i\omega_d x_0) e^{i\omega_d t} - i(\dot{A}_0^* + 2i\omega_d A_0^*) e^{2i\omega_d t} \\ &= \left( \Omega_1 - \omega_d - i\frac{\gamma_1}{2} \right) (2x_0 e^{i\omega_d t} - A_0^* e^{2i\omega_d t}) + g(2y_1 e^{i\omega_d t} - B_1^* e^{2i\omega_d t}) \\ & \quad - 2f \cos(\omega_d t) e^{i\omega_d t} + f e^{2i\omega_d t}, \end{aligned} \quad (\text{S.9})$$

$$\begin{aligned} & 2i(\dot{y}_1 + i\omega_d y_1) e^{i\omega_d t} - i(\dot{B}_1^* + 2i\omega_d B_1^*) e^{2i\omega_d t} \\ &= \left( \Omega_2 - \omega_d - i\frac{\gamma_2}{2} \right) (2y_1 e^{i\omega_d t} - B_1^* e^{2i\omega_d t}) + g(2x_0 e^{i\omega_d t} - A_0^* e^{2i\omega_d t}) \end{aligned} \quad (\text{S.10})$$

Equating the coefficients of like power of  $e^{i\omega_d t}$  in (S.9) and (S.10), we have

$$i\dot{x}_0 = \left( \Omega_1 - i\frac{\gamma_1}{2} \right) x_0 + g y_1 - f \cos(\omega_d t), \quad (\text{S.11})$$

$$i\dot{A}_0^* = \left( \Omega_1 + \omega_d - i\frac{\gamma_1}{2} \right) A_0^* + g B_1^* - f, \quad (\text{S.12})$$

and

$$i\dot{y}_1 = \left( \Omega_2 - i\frac{\gamma_2}{2} \right) y_1 + g x_0, \quad (\text{S.13})$$

$$i\dot{B}_1^* = \left( \Omega_2 + \omega_d - i\frac{\gamma_2}{2} \right) B_1^* + g A_0^*, \quad (\text{S.14})$$

Equations (S.12) and (S.14) are the equations of motion in the negative-frequency frames, which are conjugations of (S.7). Equations (S.11) and (S.13) constitute the equations of motion in the Floquet frame,

$$i \begin{bmatrix} \dot{x}_0 \\ \dot{y}_1 \end{bmatrix} = \begin{bmatrix} \Omega_1 - i\gamma_1/2 & g \\ g & \Omega_2 - i\gamma_2/2 \end{bmatrix} \begin{bmatrix} x_0 \\ y_1 \end{bmatrix} - \begin{bmatrix} f \cos(\omega_d t) \\ 0 \end{bmatrix}. \quad (\text{S.15})$$

The dynamic matrix of the equations of motion (S.15) is regarded as the effective Hamiltonian,

$$\mathbf{H} = \begin{bmatrix} \Omega_1 - i\frac{\gamma_1}{2} & g \\ g & \Omega_2 - i\frac{\gamma_2}{2} \end{bmatrix} = \begin{bmatrix} \omega_1 - \frac{\kappa V_p^2}{8\omega_1} - i\frac{\gamma_1}{2} & g \\ g & \omega_1 - \frac{\kappa V_p^2}{8\omega_2} - \delta_p - i\frac{\gamma_2}{2} \end{bmatrix}. \quad (\text{S.16})$$

where  $\delta_p$  is the detuning of the pump,  $\delta_p \equiv \omega_p - \Delta\omega$ . The eigenvalues of this non-Hermitian Hamiltonian is obtained by calculating  $\det(\mathbf{H} - \lambda\mathbf{I}) = 0$ ,

$$\begin{aligned}\lambda_{\pm} &= \frac{\Omega_1 + \Omega_2}{2} - i\frac{\gamma_1 + \gamma_2}{4} \pm \sqrt{\left(\frac{\Omega_2 - \Omega_1}{2} - i\frac{\gamma_2 - \gamma_1}{4}\right)^2 + g^2} \\ &= \omega_1 - \frac{\kappa V_p^2}{16} \left(\frac{1}{\omega_1} + \frac{1}{\omega_2}\right) - i\frac{\gamma_1 + \gamma_2}{4} \\ &\quad \pm \sqrt{\left[\frac{\kappa V_p^2}{16} \left(\frac{1}{\omega_1} - \frac{1}{\omega_2}\right) - \frac{\delta_p}{2} - i\frac{\gamma_2 - \gamma_1}{4}\right]^2 + g^2}.\end{aligned}\tag{S.17}$$

### C. Steady-state responses

The steady-state information of the system can be obtained by letting  $\dot{A}_0 = \dot{B}_1 = 0$  for (S.7), which gives

$$\begin{bmatrix} A_0 \\ B_1 \end{bmatrix} = \begin{bmatrix} \Omega_1 - \omega_d - i\gamma_1/2 & g \\ g & \Omega_2 - \omega_d - i\gamma_2/2 \end{bmatrix}^{-1} \begin{bmatrix} f \\ 0 \end{bmatrix},\tag{S.18}$$

The complex amplitudes of the mode 1 and the first idler wave of mode 2 are given by

$$A_0 = f \frac{\Omega_2 - \omega_d - i\gamma_2/2}{(\omega_d - \lambda_+)(\omega_d - \lambda_-)},\tag{S.19}$$

$$B_1 = f \frac{-g}{(\omega_d - \lambda_+)(\omega_d - \lambda_-)}.\tag{S.20}$$

The theoretical amplitude responses are obtained by calculating  $|A_0|$  and  $|B_1|$ . The phase response of mode 1 is given by  $-\text{Arg}(A_0)$ . It is noteworthy that the phase of the mode-2 idler wave is not directly represented by  $-\text{Arg}(B_1)$  due to the contribution of the pump phase to the overall phase of the idler wave. Since the pump phase is arbitrary and uncontrollable in this study, the overall phase of the mode-2 idler wave is undetectable.
